# Supplementary material
Source: ML conference proceedings conference paper supplement (https://aclanthology.org/D19-1504)
Supplement: Attachment [file 3072_paper_supplementary.pdf › 3072_paper_supplementary.pdf]

# Practical Correlated Topic Modeling and Analysis via the Rectified Anchor Word Algorithm (Supplementary Material)

Moontae Lee<sup>1</sup> Sungjun Cho<sup>2</sup> David Bindel<sup>2</sup> David Mimno<sup>2</sup>

<sup>1</sup>University of Illinois at Chicago, Microsoft Research at Redmond

<sup>2</sup>Cornell University

moontae@uic.edu, {sc782, bindel, mimno}@cornell.edu

## A Implementation

For reproducibility, we provide pseudocode for algorithms integrated in different parts of JSMF.

### A.1 Rectification

---

#### Algorithm 1 Alternating Projection

---

**def** RECTIFY-C-AP( $C, K$ )

- 1:  $C_{NN} \leftarrow C$
  - 2: **repeat**
  - 3:    $(U, \Lambda_K) = \text{TRUNCATED-EIG}(C_{NN}, K)$
  - 4:    $\Lambda_K^+ \leftarrow \text{diag}(\max\{\text{diag}(\Lambda_K), 0\})$
  - 5:    $C_{PSD} \leftarrow U \Lambda_K^+ U^T$
  - 6:    $C_{NOR} \leftarrow C_{PSD} + \frac{1 - \sum_{i,j} C_{PSD}(i,j)}{N^2} \mathbf{1}\mathbf{1}^T$
  - 7:    $C_{NN} \leftarrow \max\{C_{NOR}, 0\}$
  - 8: **until** the convergence of  $C_{NN}$
  - 9: **return**  $C \leftarrow C_{NN} / (\sum_{i,j} C_{NN}(i,j))$
- 

$\text{diag}(\cdot)$  is the Matlab-style operation that maps the input vector into the diagonal matrix or extracts the diagonal vector from the input matrix.

---



---

#### Algorithm 2 Cyclic Douglas-Rachford Iteration

---

**def** RECTIFY-C-DR( $C, K$ )

- 1:  $C_3 \leftarrow C$
  - 2: **repeat**
  - 3:    $C_1 \leftarrow \frac{I + R_{NOR} R_{PSD}}{2} C_3$
  - 4:    $C_2 \leftarrow \frac{I + R_{NN} R_{NOR}}{2} C_1$
  - 5:    $C_3 \leftarrow \frac{I + R_{PSD} R_{NN}}{2} C_2$
  - 6: **until** the convergence of  $C_3$
  - 7: **return**  $C \leftarrow C_3 / (\sum_{i,j} C_3(i,j))$
- 

$I$  is the identity mapping,  $R_{NOR} R_{PSD}$  denotes the composition of two reflection operators: the matrix is first reflected onto the  $PSD$  space, then onto the  $NOR$  space.  $R_{PSD} C = 2C_{PSD} - C$ , and similarly for  $NOR$  and  $NN$ .

---

### A.2 Topic Inference

---

#### Algorithm 3 Sparse Implicit Column-pivoted QR

---

**def** FIND-S( $\bar{C}, K$ )

- 1:  $(P, Q, S, r) \leftarrow (\bar{C}^T, \mathbf{0}^{N \times K}, \emptyset, \mathbf{0}^K)$
  - 2:  $u \leftarrow (\|p_1\|_2^2, \dots, \|p_N\|_2^2) \in \mathbb{R}^{1 \times N}$
  - 3: **for**  $k = 1$  to  $K$  **do**
  - 4:    $n \leftarrow \arg\max_{1 \leq i \leq N} u_i$
  - 5:    $(S, q_k, r_k) \leftarrow (S \cup \{n\}, p_n, \sqrt{u_n})$
  - 6:    $q_k \leftarrow (q_k - \sum_{l=1}^{k-1} \langle q_l, p_n \rangle q_l) / r_k$
  - 7:    $u \leftarrow u - (q_k^T P) \circ (q_k^T P)$
  - 8: **end for**
  - 9: **return**  $(S, r)$
- 

$\circ : \mathbb{R}^N \times \mathbb{R}^N \rightarrow \mathbb{R}^N$  denotes entry-wise multiplication of two vectors.

---



---

#### Algorithm 4 ADMM

---

**def** RECOVER-B( $\bar{C}, c, S, \lambda, \gamma$ )

- 1:  $(U, \check{B}, B) \leftarrow ((\bar{C}_{S^*})^T, \mathbf{0}^{K \times N}, \mathbf{0}^{N \times K})$
  - 2:  $\check{B}_{*S} \leftarrow I_K$  ( $I_K = K \times K$  identity matrix)
  - 3:  $F \leftarrow (\gamma U^T U + I_K)^{-1}$
  - 4: **for each**  $i \in \{1, \dots, N\} \setminus S$  (in parallel) **do**
  - 5:    $(v, f) \leftarrow ((\bar{C}_{i^*})^T, \gamma U^T v)$
  - 6:    $y^{(0)} \leftarrow \Pi_{\Delta^{K-1}}((U^T U)^{-1}(f/\gamma))$
  - 7:    $q^{(0)} \leftarrow y^{(0)}$
  - 8:   **repeat**
  - 9:      $p^{(t)} \leftarrow F(2y^{(t-1)} - q^{(t-1)} + f)$
  - 10:     $q^{(t)} \leftarrow q^{(t-1)} + \lambda(p^{(t)} - y^{(t-1)})$
  - 11:     $y^{(t)} \leftarrow \Pi_{\Delta^{K-1}}(q^{(t)})$
  - 12:   **until** the convergence of  $y^{(t)}$
  - 13:    $\check{B}_{*i} \leftarrow y^{(t)}$
  - 14: **end for**
  - 15: **for**  $(i, k) \in \{1, \dots, N\} \times \{1, \dots, K\}$  **do**
  - 16:    $B_{ik} \leftarrow (\check{B}_{ki} c_i) / (\sum_{i'=1}^N \check{B}_{ki'} c_{i'})$
  - 17: **end for**
  - 18: **return**  $B$
- 

$\Pi_{\Delta^{K-1}}(\cdot)$  is the orthogonal projection to the  $K - 1$  simplex.

---

---

**Algorithm 5** Diagonal Recovery

---

**def** RECOVER-A( $C, B, S$ )

- 1:  $(C_{SS}, D) \leftarrow (C(S, S), B(S, *))$
  - 2:  $A \leftarrow D^{-1}C_{SS}D^{-1}$
  - 3: **return**  $A$
- 

Set indexing extracts a principle submatrix whose rows and columns correspond to the arguments. Since  $B(S, *)$  is diagonal, we use the element-wise reciprocal of  $D$  as  $D^{-1}$ .

---
